# Supplementary material for: Mn3O4/graphene composite as counter electrode in dye-sensitized solar cells
Source: Royal Society of Chemistry journal article supplement (doi:10.1039/c4ra00347k), 2014-01-01
Supplement: c4ra00347k1.pdf [file c4ra00347k1.pdf]

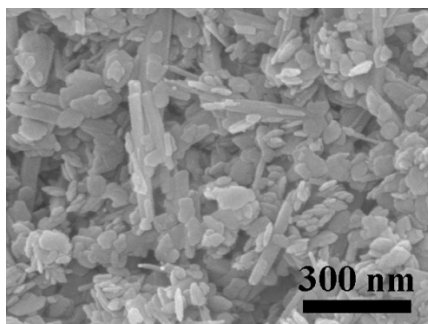

**Fig.S1 SEM images for the MnO<sub>2</sub> nanoparticles**

Nanostructure of MnO<sub>2</sub> is clearly shown with SEM images in Fig.S1. As can be seen from the pictures, the particles have different shapes, the mostly was with the size about 30-300 nm.
